# Supplementary material for: Preferential transfer of mitochondria from endothelial to cancer cells through tunneling nanotubes modulates chemoresistance
Source: PubMed Central journal article supplement (PMC3668949; doi:10.1186/1479-5876-11-94), 2013-04-10

# Supplementary Figure 1.

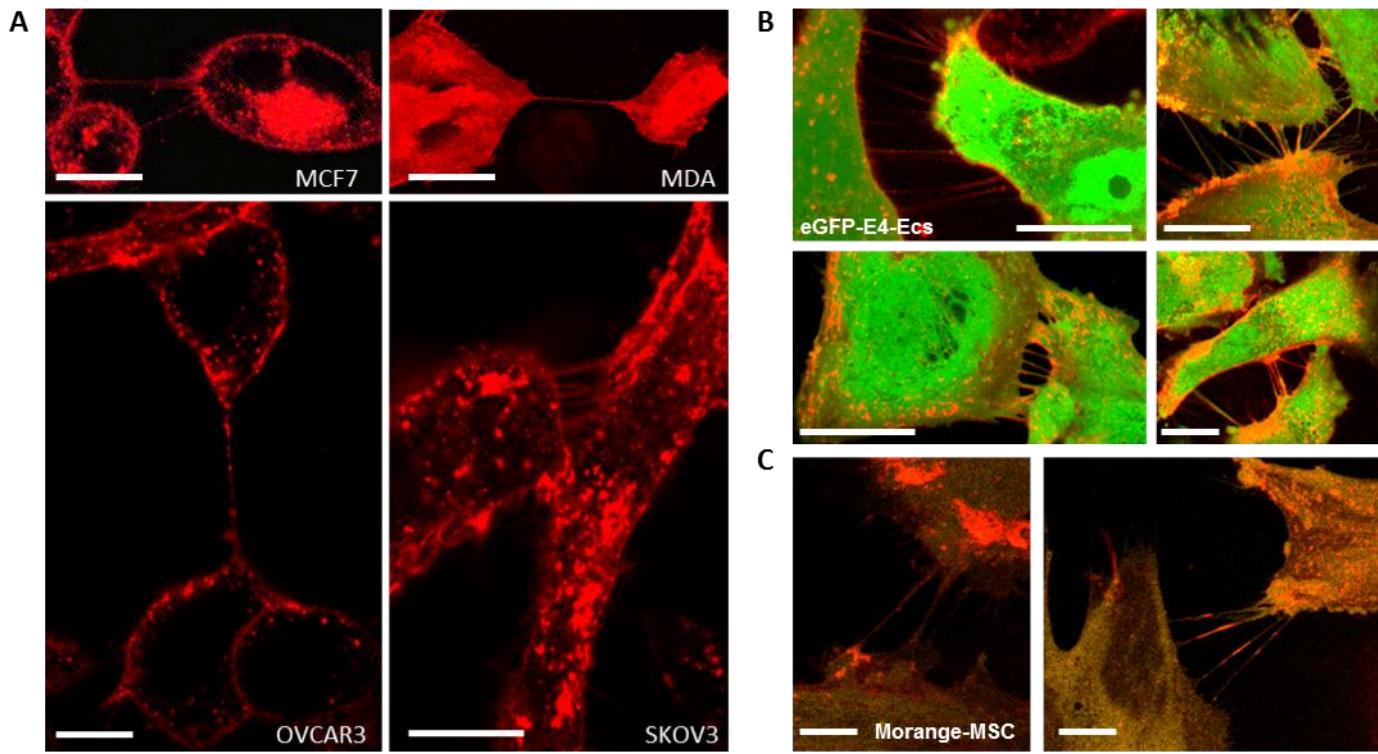

## Supplementary Figure 2.

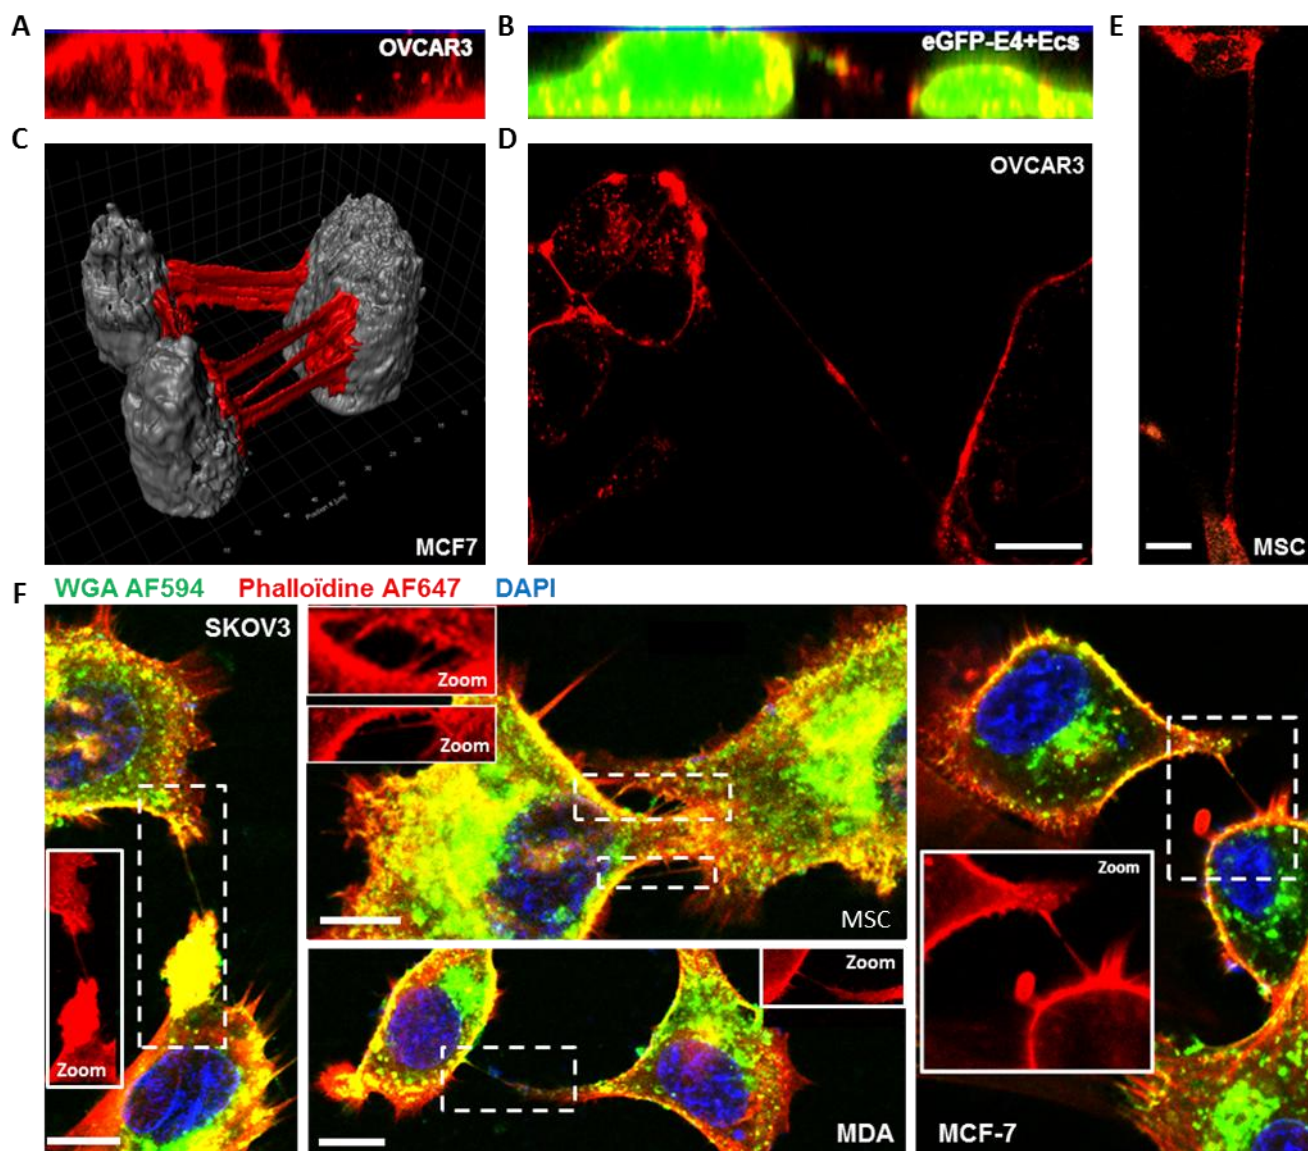

### Supplementary Figure 3.

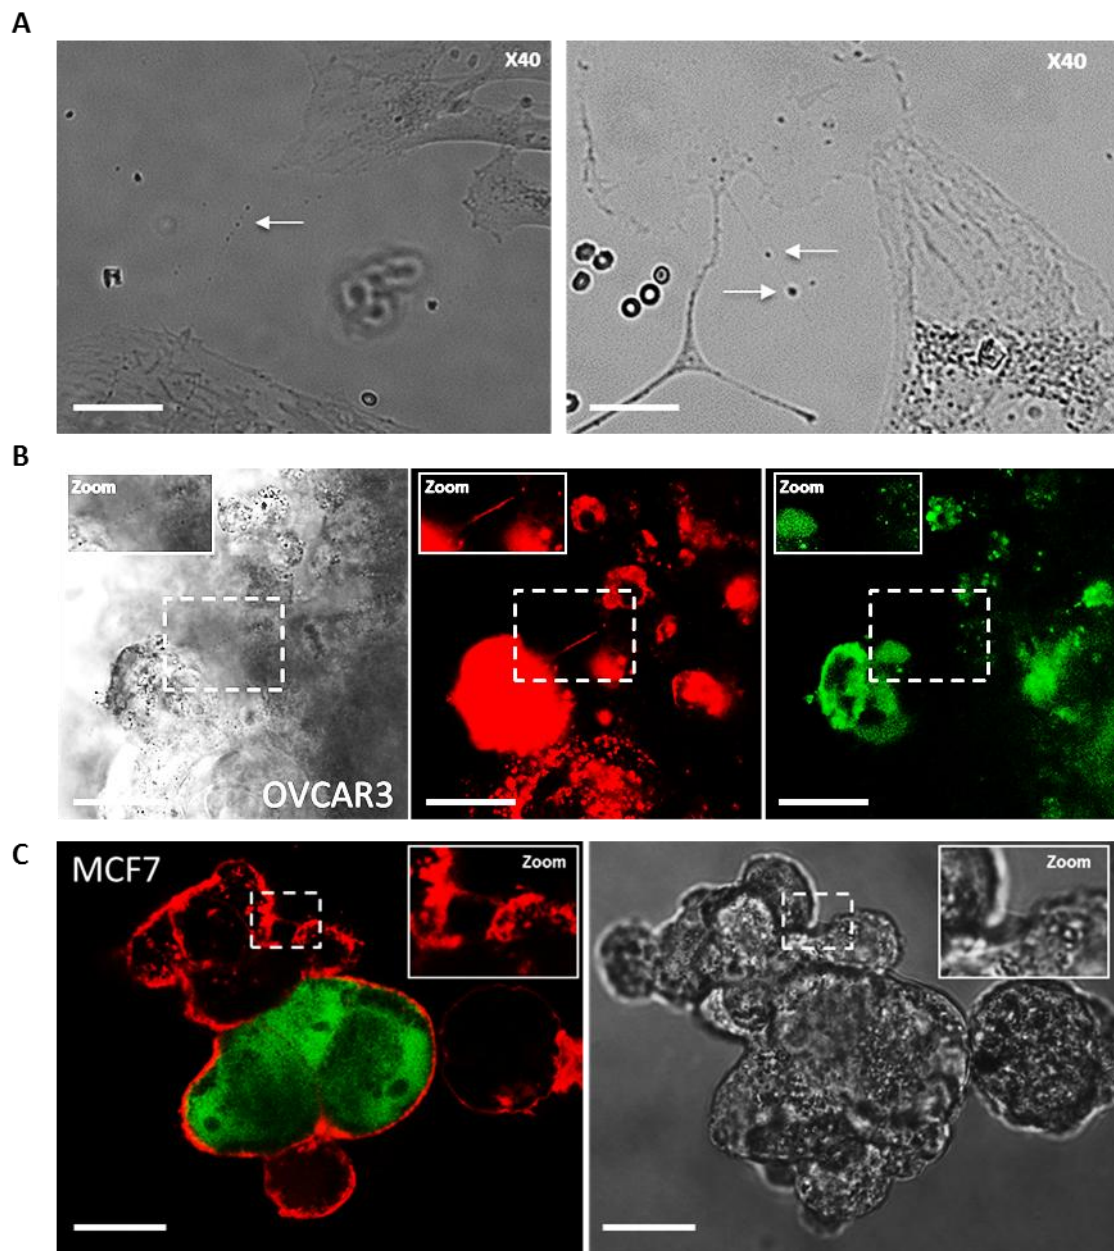

# Supplementary Figure 4.

A

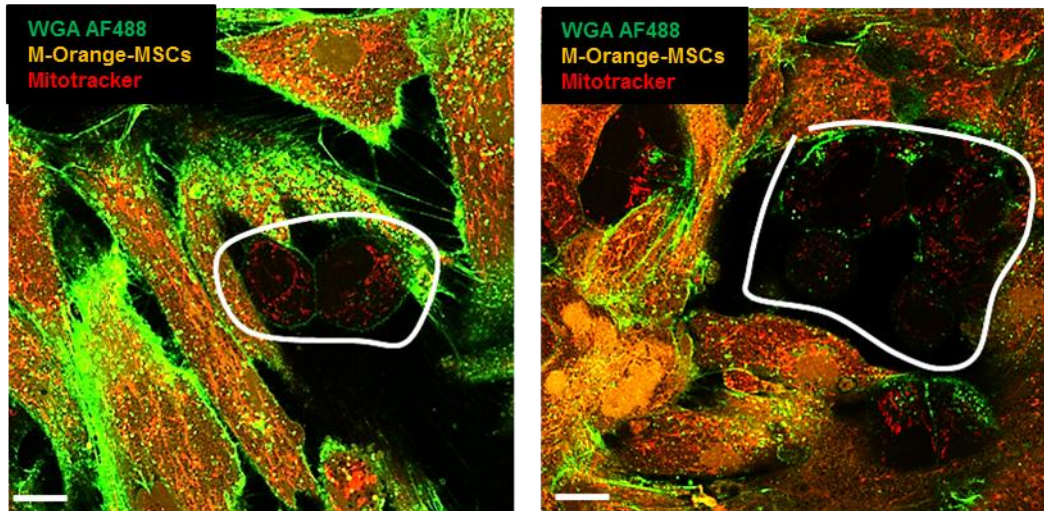

B

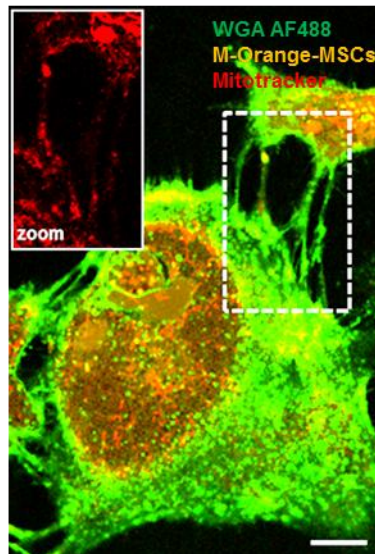

C

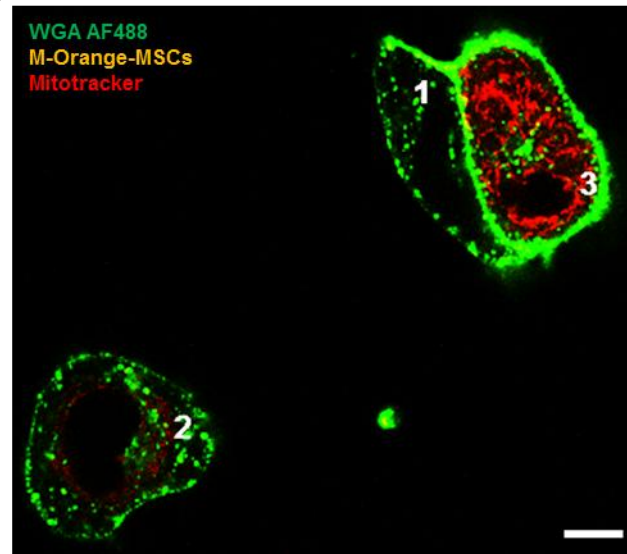

# Supplementary Figure 5.

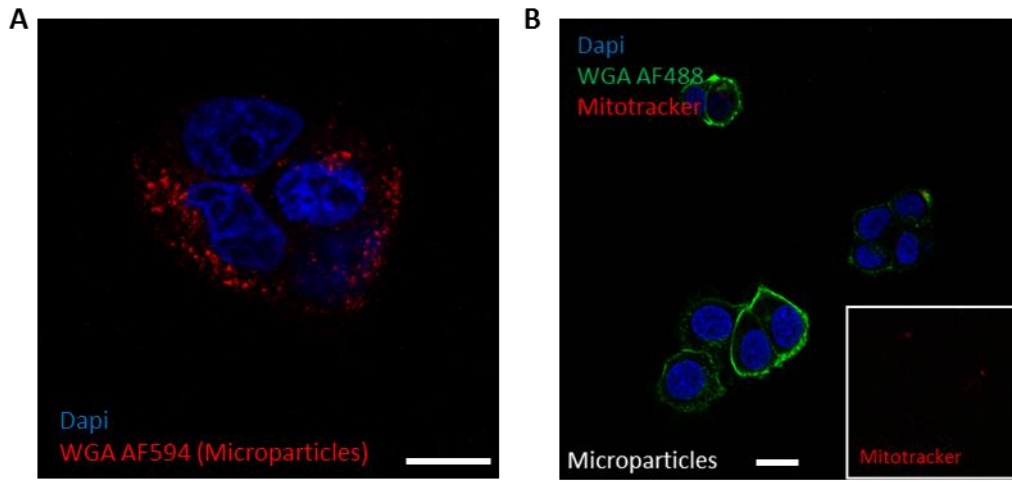

# Supplementary Figure 6.

A

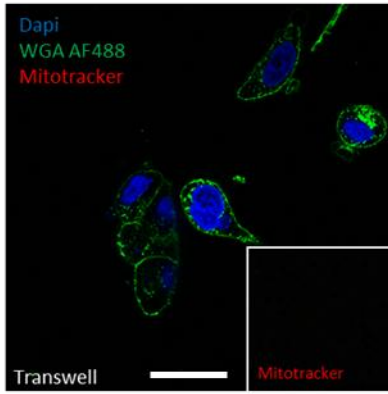

B

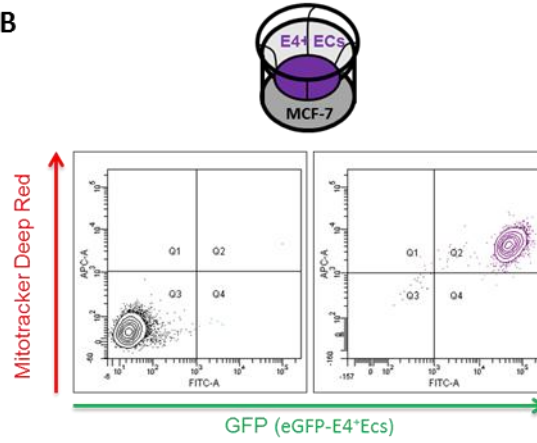

C

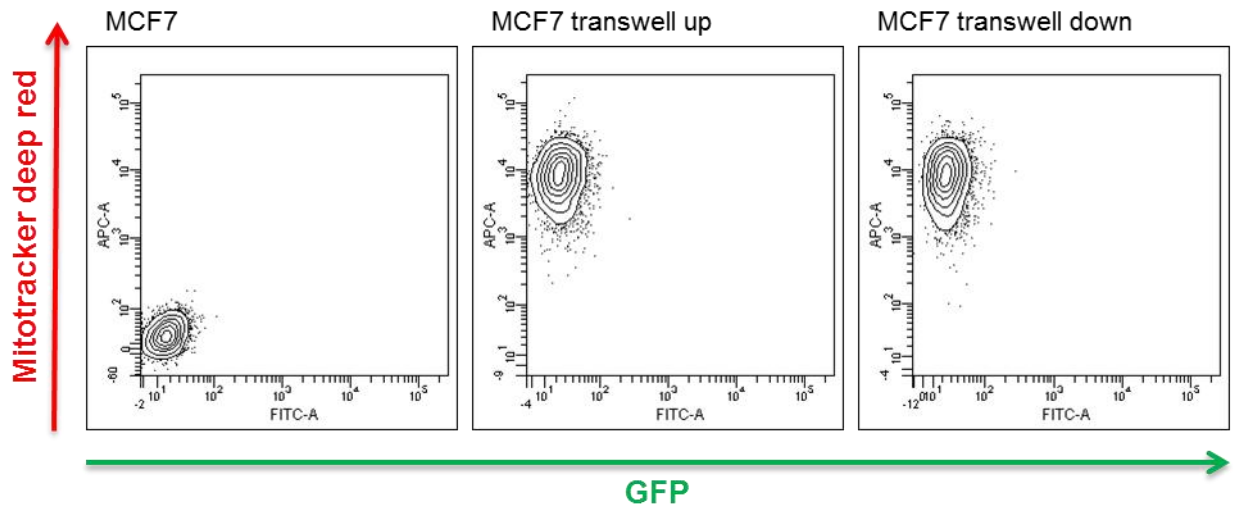

Supplementary Figure 7.

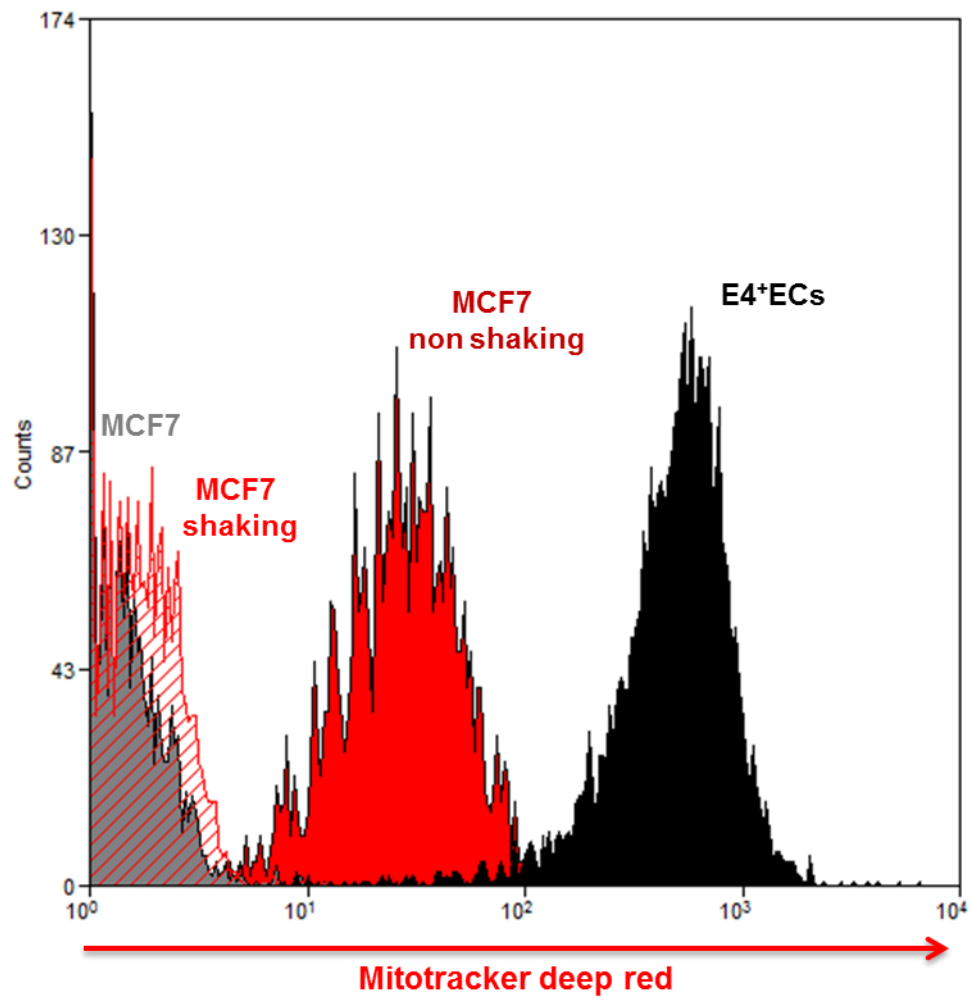

Supplement: 1479-5876-11-94-S1.pdf [file 1479-5876-11-94-S1.pdf]
